# Supplementary material for: Optimized Green Extraction of Polyphenols from Cassia javanica L. Petals for Their Application in Sunflower Oil: Anticancer and Antioxidant Properties
Source: MDPI journal article supplement (doi:10.3390/molecules27144329), 2022-07-06
Supplement: s1 [file s1]

## Supplementary Data:

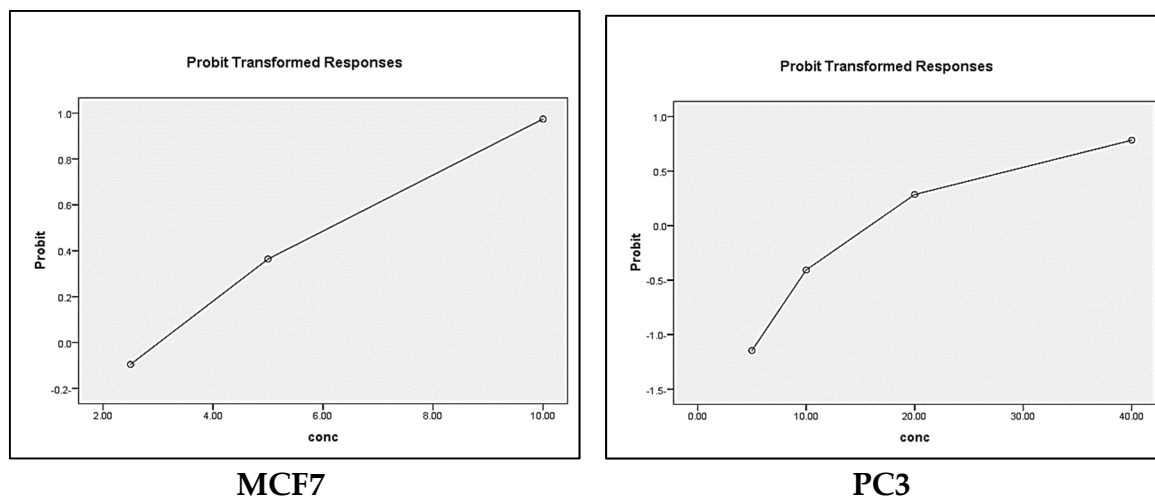

**Figure S1.** The relationship between TPC concentration and the inhibition of cancer cells (breast, and prostate cancer)

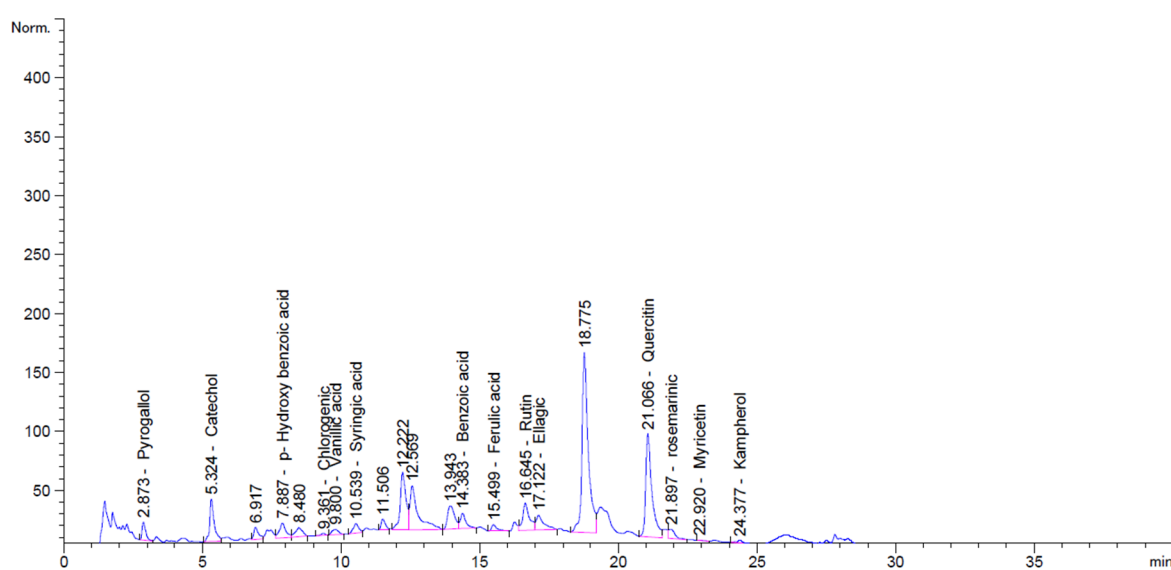

Figure S2. Solvent Extraction Chromatogram

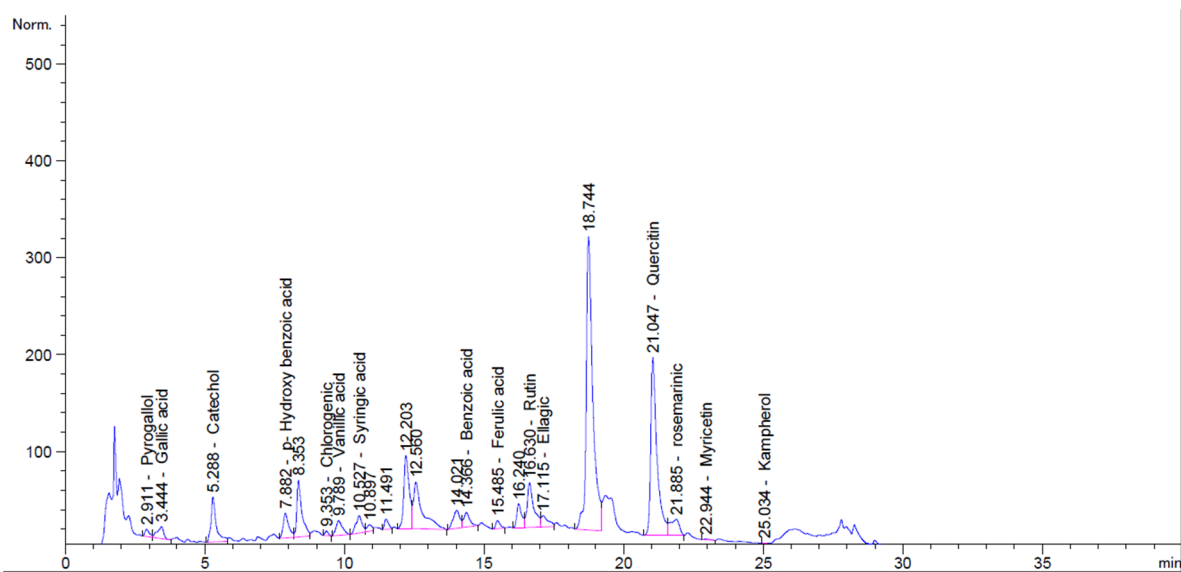

Figure S3. Ultrasound-Assisted Extraction Chromatogram

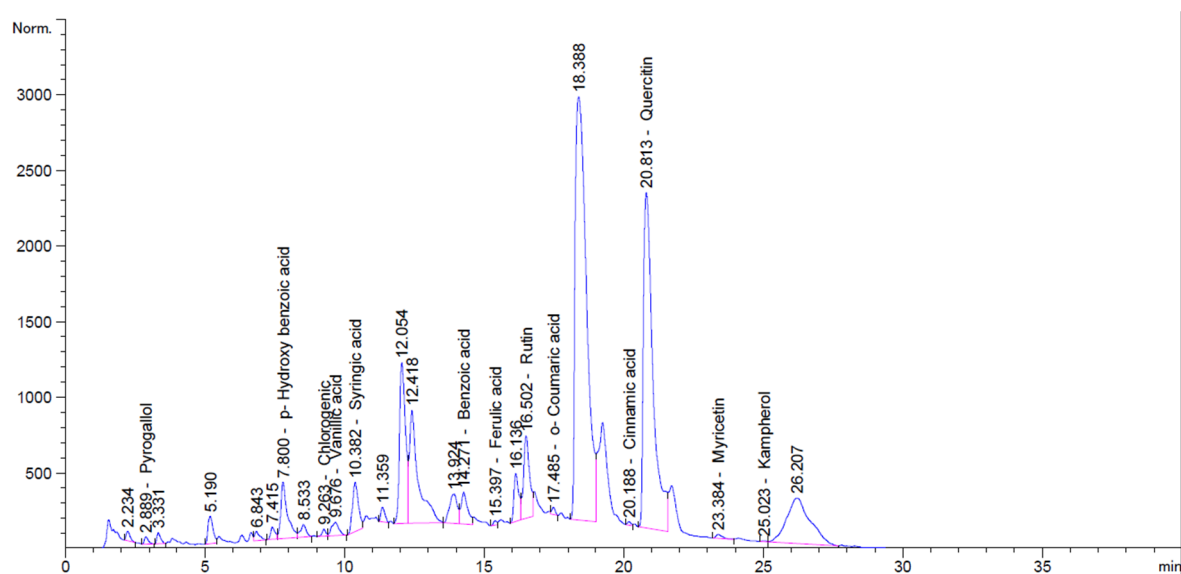

**Figure S4.** SCF-CO<sub>2</sub> Extraction Chromatogram
